# Supplementary material for: Differential Roles of Three α-Crystallin Domain-Containing sHsps of Beauveria bassiana in Asexual Development, Multiple Stress Tolerance and Virulence
Source: MDPI journal article supplement (doi:10.3390/ijms23126717), 2022-06-16
Supplement: s1 [file s1]

**Journal:** International Journal of Molecular Sciences

**Differential Roles of Three  $\alpha$ -Crystallin Domain-Containing sHsps of *Beauveria bassiana* in Asexual Development, Multiple Stress Tolerance and Virulence**

Gang Zhou <sup>1,2</sup>, Sheng-Hua Ying<sup>3</sup>, Ming-Guang Feng <sup>3,\*</sup>, Jie Wang <sup>1,\*</sup>

<sup>1</sup> College of Food Science, South China Agricultural University, Guangzhou, 510642, People's Republic of China

<sup>2</sup> Guangdong Provincial Key Laboratory of Microbial Culture Collection and Application, State Key Laboratory of Applied Microbiology Southern China, Institute of Microbiology, Guangdong Academy of Sciences, Guangzhou, 510070, People's Republic of China

<sup>3</sup> Institute of Microbiology, College of Life Sciences, Zhejiang University, Hangzhou, 310058, People's Republic of China

Gang Zhou: [zgbees@gdim.cn](mailto:zgbees@gdim.cn)

Sheng-Hua Ying: [yingsh@zju.edu.cn](mailto:yingsh@zju.edu.cn)

Ming-Guang Feng: [mgfeng@zju.edu.cn](mailto:mgfeng@zju.edu.cn)

Jie Wang: [jiewang@scau.edu.cn](mailto:jiewang@scau.edu.cn)

**\* Corresponding author.** Ming-Guang Feng: [mgfeng@zju.edu.cn](mailto:mgfeng@zju.edu.cn), College of Life Sciences, Zhejiang University, Hangzhou, 310058, People's Republic of China; Jie Wang: [jiewang@scau.edu.cn](mailto:jiewang@scau.edu.cn), College of Food Science, South China Agricultural University, Guangzhou, Guangdong, 510642, People's Republic of China

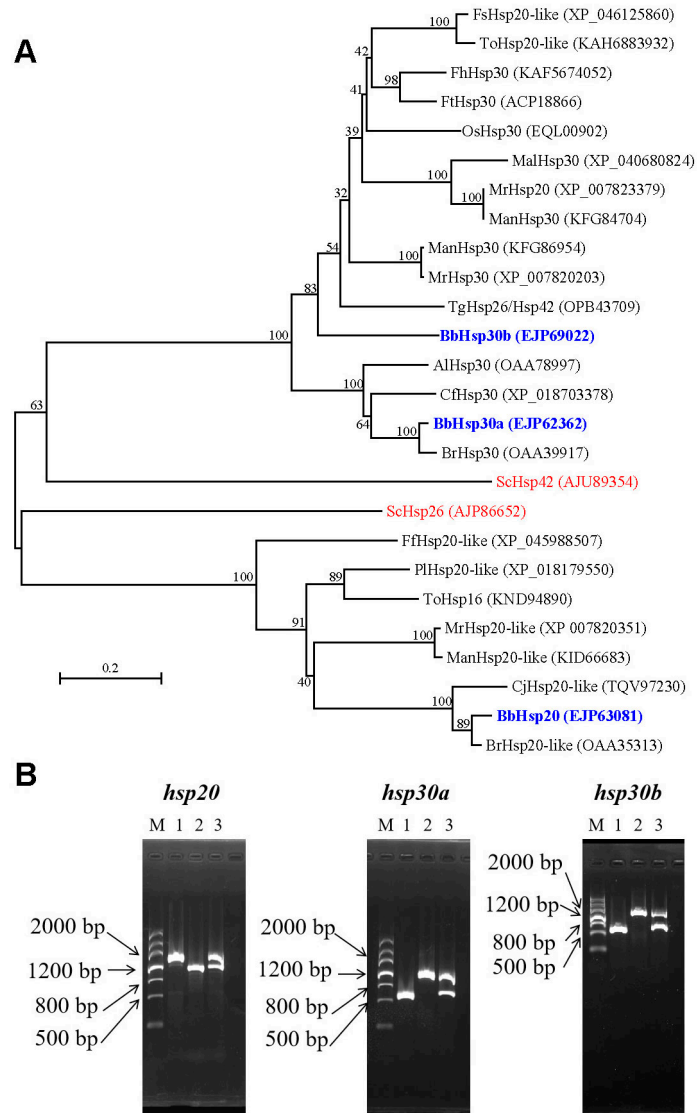

**Figure S1.** Phylogenetic analysis of three  $\alpha$ -crystallin domain-containing sHsp genes found in the genome database of *B. bassiana* and identification of their mutants. **(A)** Phylogenetic tree for three sHsps of *B. bassiana* and other fungi based on a neighbor-joining method in MEGA7. The NCBI accession code of a given protein are given in the parentheses following each fungal name. Scale bar: branch length proportional to genetic distance. **(B)** The *hsp20*, *hsp30a* and *hsp30b* mutants identified via PCR. Lane 1: wild-type strain. Lane 2: deletion mutant. Lane 3: complemented mutant.

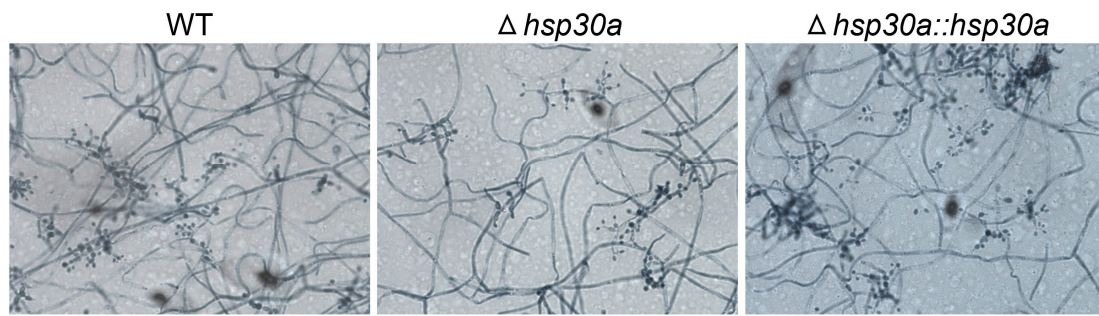

**Figure S2.** Conidiophores and conidia after conidia were cultivated on SDAY plates for 3 days, and visualized at  $400\times$  magnification.

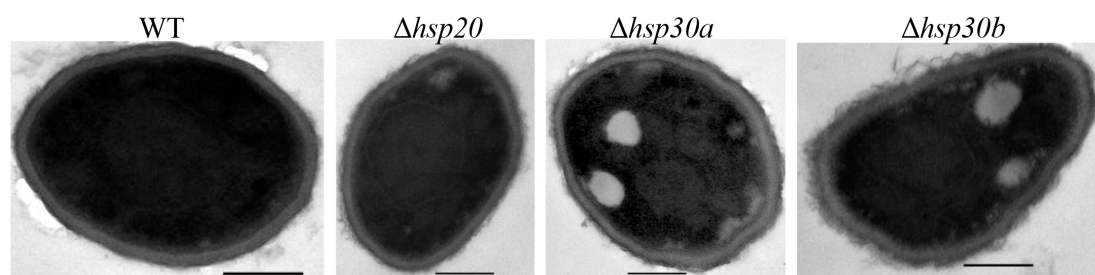

**Figure S3.** Images for the ultrathin sections of conidia observed under transmission electron microscopy (TEM).

**Table S1** The paired primers used for the manipulation of *hsp20*, *hsp30a*, and *hsp30b* in this study

| Name         | Paired sequences (5'-3')*                                                                                               | Purpose                                          |
|--------------|-------------------------------------------------------------------------------------------------------------------------|--------------------------------------------------|
| hsp20-F/R    | ATGGCCCCACGCAACAACC / TCACAGAAATGCCACCTTGCG                                                                             | Amplification of <i>hsp20</i>                    |
| hsp30a-F/R   | ATGTCTCTTTTCCCCG / GTTGATAGCAATGCGTCG                                                                                   | Amplification of <i>hsp30a</i>                   |
| hsp30b-F/R   | ATGGCTTCCTTCTTCCCC / GTTGATGCTGATGCGGAC                                                                                 | Amplification of <i>hsp30b</i>                   |
| hsp20up-F/R  | AAAAAGGATCCTCATTGCCTCCATCCATACCG / AAAAAAGCTTCGAGTTGGTTGTTGCGTGG                                                        | Cloning <i>hsp20</i> 5'-end (2135 bp)            |
| hsp20dn-F/R  | AAAAAAGATCTATGATGTGATGCGTGCTG / AAAAAAGTAACTCTGCCCCATCTGTCTACG                                                          | Cloning <i>hsp20</i> 3'-end (1537 bp)            |
| hsp30aup-F/R | AAAAAGGATCCTCGCGCTAATTTTGGTACTAAGGT / AAAAAAGCTCTGTTTGCAAGTGGTTGATGCTTGAT                                               | Cloning <i>hsp30a</i> 5'-end (1406 bp)           |
| hsp30adn-F/R | AAAAAAGATCTTGTTCGGACAAGCAACCATC / AAAAAAGTAGTTCATATCTTCTTGGCCATCTCAC                                                    | Cloning <i>hsp30a</i> 3'-end (1374 bp)           |
| hsp30bup-F/R | AAAAAGGATCCTGTCATACTCCGATTGATTGG / AAAAAAGTAACTCTGCCCCATCTGTCTACG                                                       | Cloning <i>hsp30b</i> 5'-end (1411 bp)           |
| hsp30bdn-F/R | AAAAAAGATCTAGCAGCAGAACCCAGCAGC / AAAAAAGTAGTTCGTAATCCCATAGGAACAAG                                                       | Cloning <i>hsp30b</i> 3'-end (1543 bp)           |
| hsp20fl-F/R  | <u>GGGGACCACTTTGTACAAGAAAGCTGGGT</u> TGATTCCGCTCTTGTCTCTG<br><u>GGGGACAAGTTTGTACAAAAAGCAGGCT</u> TAGAAGAAGTGCCGACGAGT   | /<br>Cloning full-length <i>hsp20</i> (3915 bp)  |
| hsp30afl-F/R | <u>GGGGACCACTTTGTACAAGAAAGCTGGGT</u> GAATGCCTACACTGTGGACT<br><u>GGGGACAAGTTTGTACAAAAAGCAGGCT</u> TGATTGTAAGGAAGCCAGT    | /<br>Cloning full-length <i>hsp30a</i> (2763 bp) |
| hsp30bfl-F/R | <u>GGGGACCACTTTGTACAAGAAAGCTGGGT</u> GATGACTCGGCACGAGGAAC<br><u>GGGGACAAGTTTGTACAAAAAGCAGGCT</u> TTTGTCTCAGTCCAGCGATGCC | /<br>Cloning full-length <i>hsp30b</i> (3478 bp) |
| pHsp20-F/R   | CACAGGAAGTTGATACCGAAAT / GTCAAGATGGAGATAGTTGTGGTT                                                                       | PCR detecting <i>hsp20</i>                       |
| pHsp30a-F/R  | CAACATCAAGACTACAACCACTG / CTTAGTTGATAGCAATGCGTCG                                                                        | PCR detecting <i>hsp30a</i>                      |
| pHsp30b-F/R  | ACAACATCAACACACACCAC / TGTTTAGTTGATGCTGATGCGG                                                                           | PCR detecting <i>hsp30b</i>                      |
| qHsp20-F/R   | TCAGGAGATGAGAAGAAC / GCTGTGATGATGTTTGT                                                                                  | qRT-PCR detecting <i>hsp20</i>                   |
| qHsp30a-F/R  | TCTTCCCTTGGTCGTGAT/GTATTGGTCGCTGCTCTC                                                                                   | qRT-PCR detecting <i>hsp30a</i>                  |
| qHsp30b-F/R  | ATGGCTTCCTTCTTCCC/AGTATGTGTCAAACTCGTC                                                                                   | qRT-PCR detecting <i>hsp30b</i>                  |

\* The underlined region indicates the restriction site (*hsp20*: *Bam*HI/*Hind*III and *Bgl*II/*Hpa*I; *hsp30a*: *Bam*HI/*Sac*I and *Bgl*II/*Spe*I; *hsp30b*: *Bam*HI/*Pst*I and *Bgl*II/*Spe*I; The italic underlined area indicates the recognition sequence of the gateway exchange reaction.
